# Supplementary material for: HCN4 channels sense temperature and determine heart rate responses to heat
Source: Springer Nature journal article supplement (doi:10.1038/s41467-025-57358-9), 2025-03-01
Supplement: MOESM2 [file 41467_2025_57358_MOESM2_ESM.pdf › 41467_2025_57358_MOESM2_ESM.pdf]

## **Description of Additional Supplementary Files**

### **File name: Supplementary Movie 1**

Description: Depicts the changes in the structure of the human HCN4 during its transitions between a closed and activated state. The orange circle highlights the linker between S4 and S5 that shows significant changes during the hHCN4 activation process. Met 407 and Tyr 409 are part of the linker switch between two distinct environments from near the solvent/lipid interface to be buried in the protein. The red sticks represent these residues.
